# Supplementary material for: A spatial agent-based model of Anopheles vagus for malaria epidemiology: examining the impact of vector control interventions
Source: Springer Nature journal article supplement (doi:10.1186/s12936-017-2075-6), 2017-10-27
Supplement: MOESM2 [file 15171182]

## Additional file 2: ABM<sub>vagus</sub> (in ZIP format).

The ABM<sub>vagus</sub> is developed in Java (Version: 1.8), using the Eclipse SDK (Version: Mars.2 Release (4.5.2)), which is freely available from [101]. The computer must have the Java Runtime Environment (Version: 1.8 or upper which can be downloaded from [102]) to run the JAR file. Instructions: (1) Download the ZIP file from <https://github.com/zahangirbd/ABMvagus> and extract it into a directory; (2) navigate into the extracted directory: for Windows, use `chdir` or `cd` in a command prompt; for UNIX/Mac, use `cd` in a terminal; (3) execute the command: `java -Xms1g -Xmx8g -d64 -jar ABMvagus.jar StandardLandscape.xml WeatherData.csv optionalId` where `optionalId` refers to an optional integer (e.g., 123) to sequence different simulation runs. To change simulation parameters, modify the sample (e.g., `StandardLandscape.xml`) input file. The runtime generally ranges a few hours. The ABM<sub>vagus</sub> will create two folders and some plain-text files inside each folder. Each folder or filename is created based on the major parameters (as extracted from the input XML file). Output files are (1) the `*.FA.txt` file, which contains the number of female adult mosquitoes in the system (one entry per day), and (2) the `*.xml` file, which contains information about the simulation job, including a listing of the major parameters and simulation events (e.g., application of interventions). Multiple/batch runs can be executed for the same input XML file by using simple scripts (e.g., UNIX shell scripts).
